# Supplementary material for: What is eating my rocks? A possible novel biological niche in limestone
Source: Copernicus journal article supplement (doi:10.5194/bg-2023-32), 2023-02-27
Supplement: Supplementary file 1 [file bg-2023-32-supplement.pdf]

## What is eating my rocks? A possible novel biological niche in limestone

Trudy M. Wassenaar<sup>1</sup>, Cees W. Passchier<sup>2\*</sup>, Nora Groschopf<sup>2</sup>, Anna Jantschke<sup>2</sup>, Regina Mertz-Kraus<sup>2</sup>, Janos L. Urai<sup>3</sup>

<sup>1</sup>Molecular Microbiology and Genomics Consultants, Zotzenheim, Germany

<sup>2</sup>Dept. of Earth Sciences, Johannes Gutenberg University, Mainz, Germany

<sup>3</sup>GeoStructures Consultancy, Maastricht, The Netherlands

Correspondence to: Cees Passchier (cpasschi@uni-mainz.de)

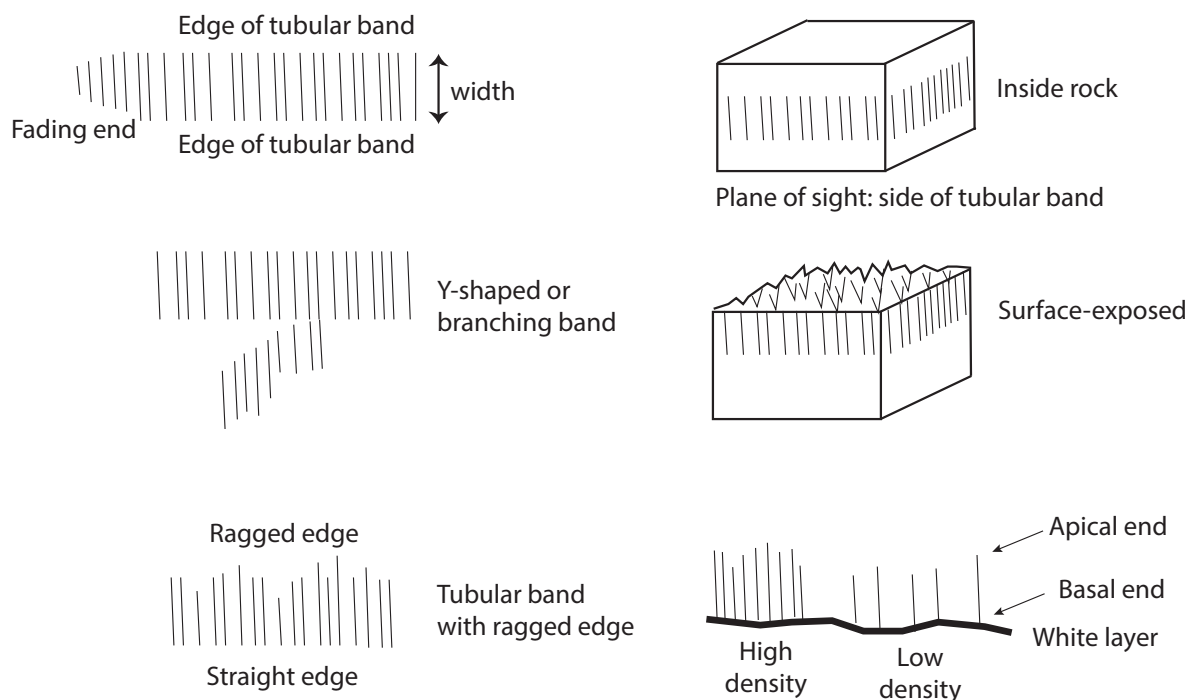

**Figure S1.** Graphical summary of terminology used



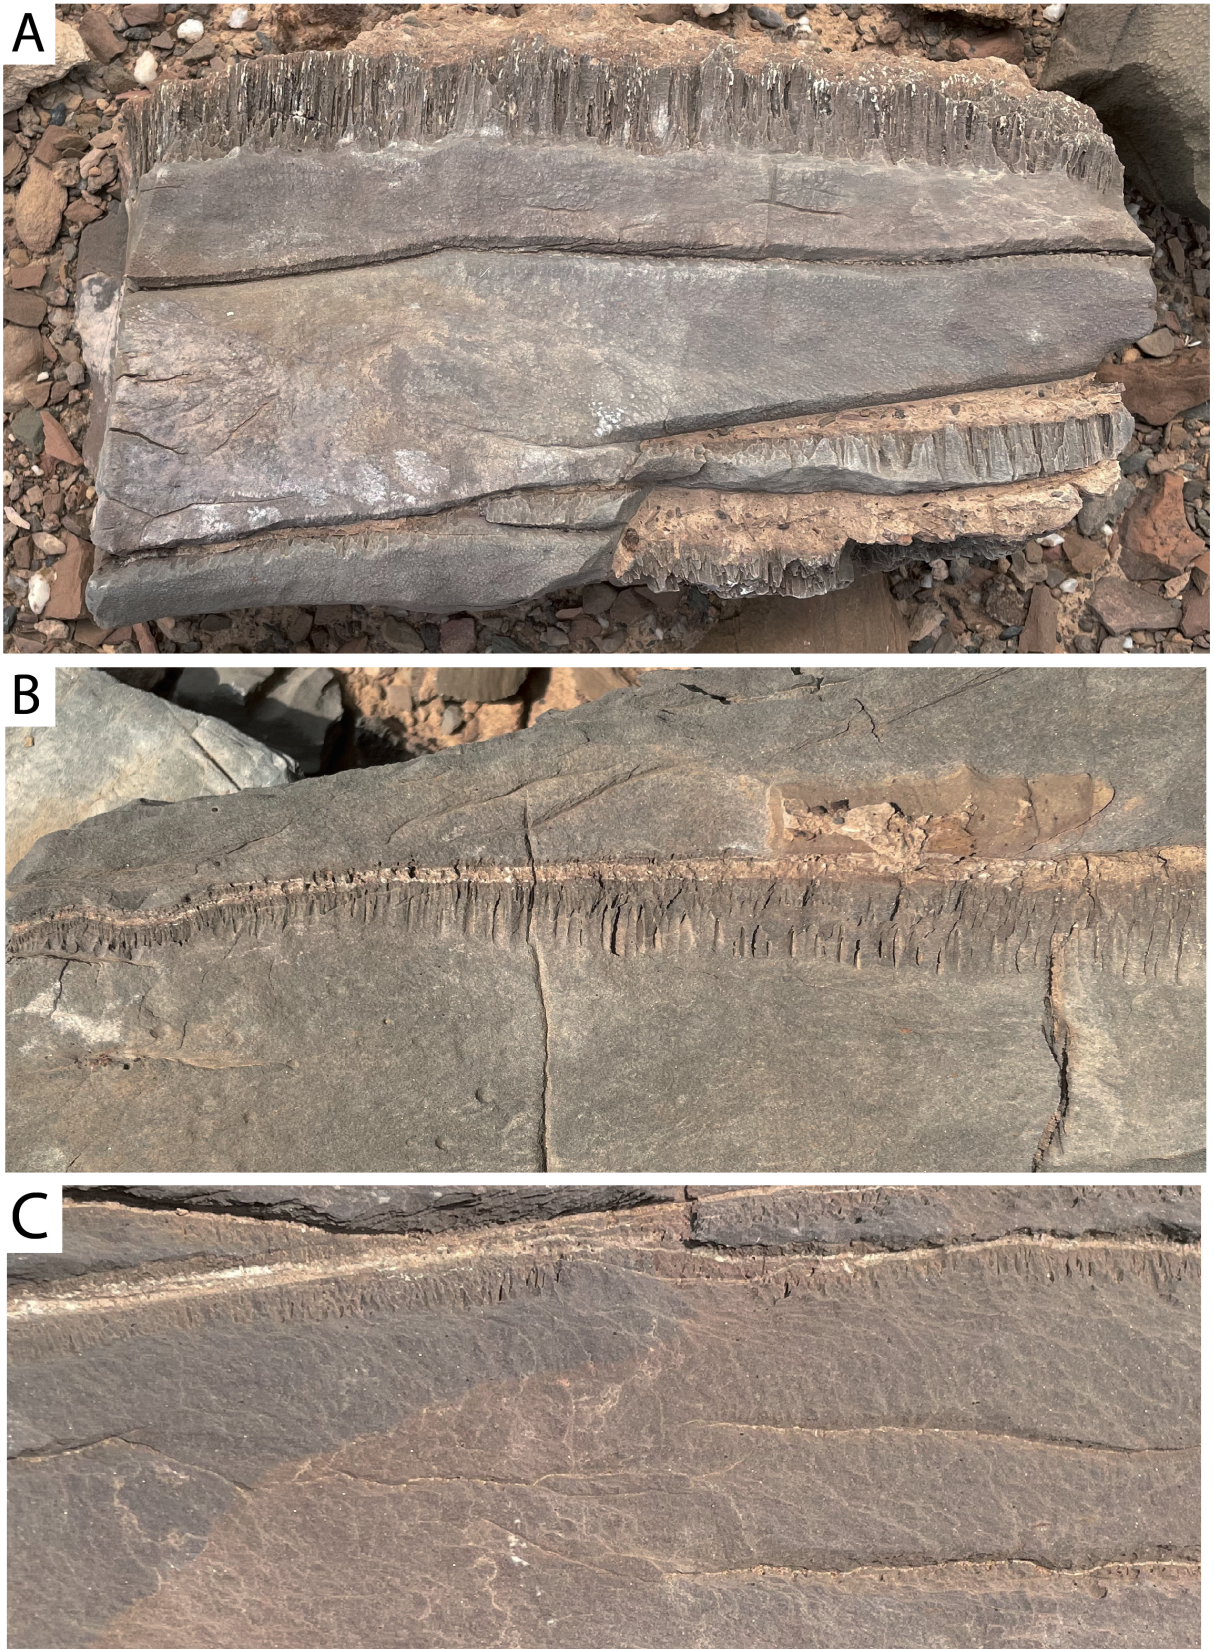

**Figure S2.** Examples of calcrete on top of a tubular layer. A: Multiple layers of calcrete and tubular bands. The top calcrete layer penetrates some of the tubules. B: A well-developed tubular band with calcrete on top. C: Several tubular bands, the top one with calcrete. The tubular band at the lower right of the photograph is weakly developed.



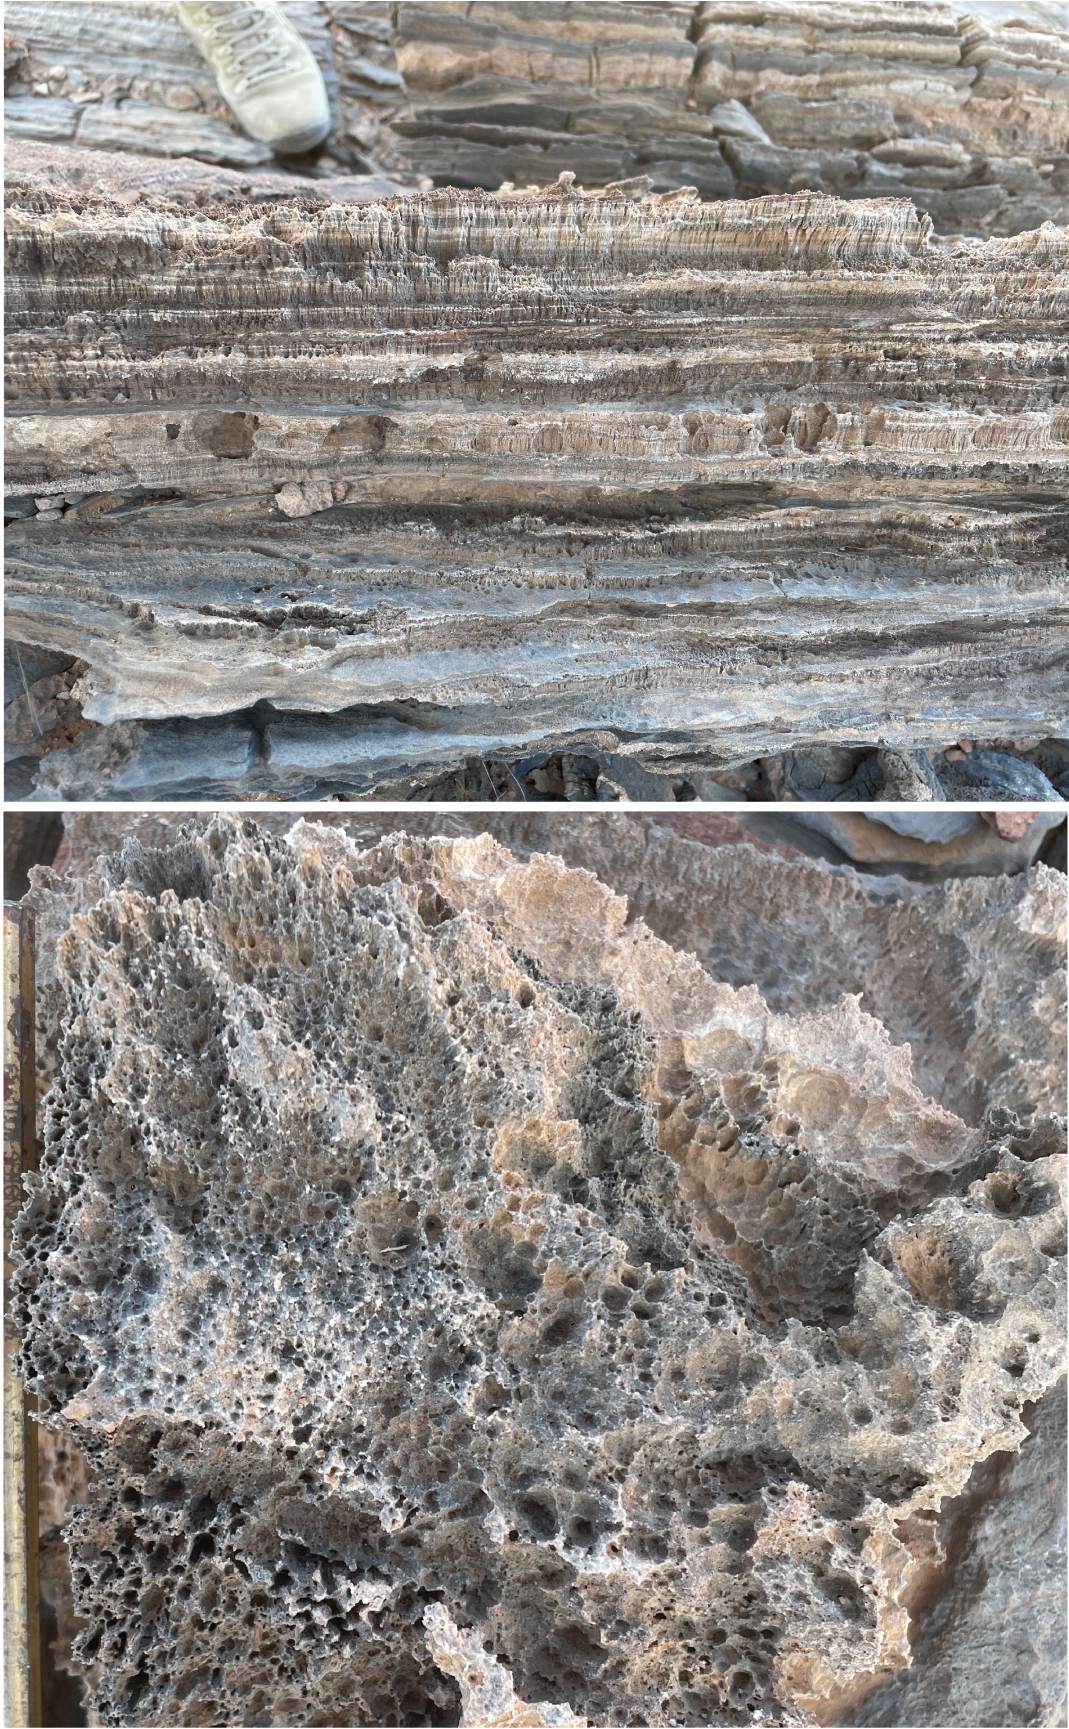

**Figure S3.** Two examples of large-scale weathering of tabular layers



A

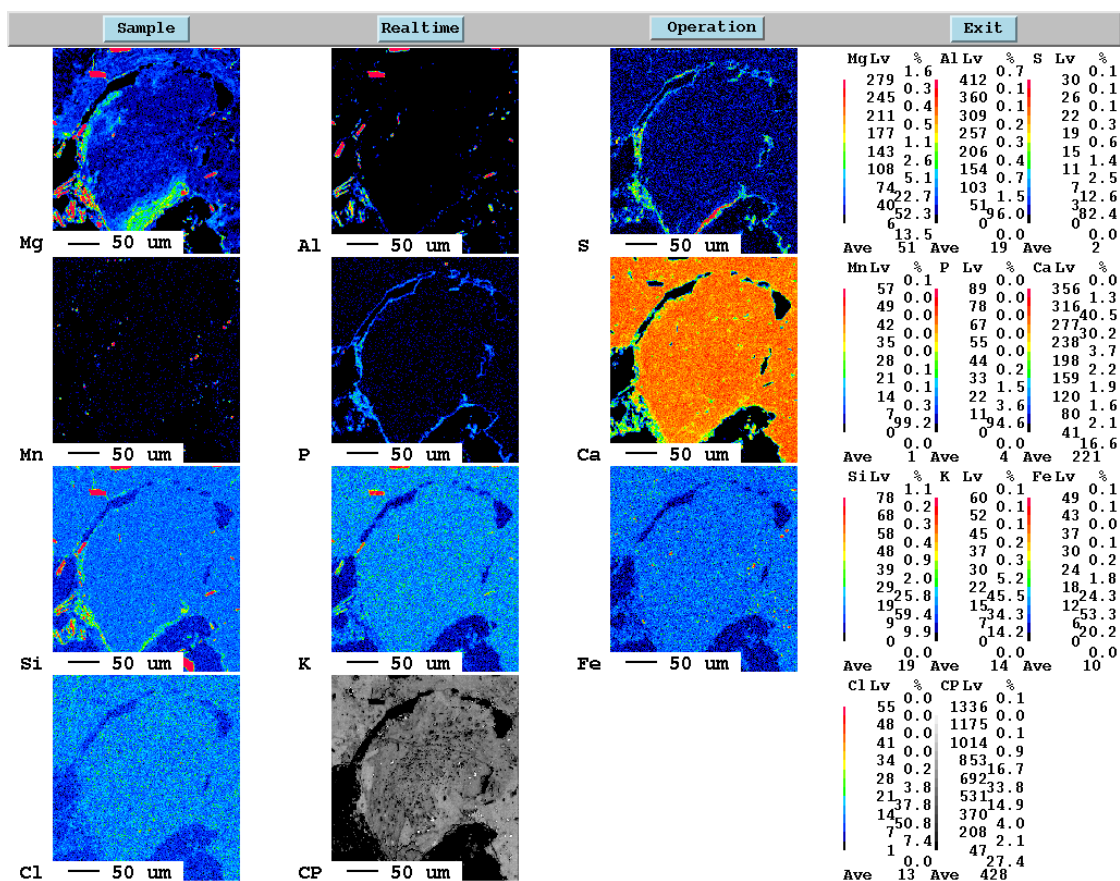

B

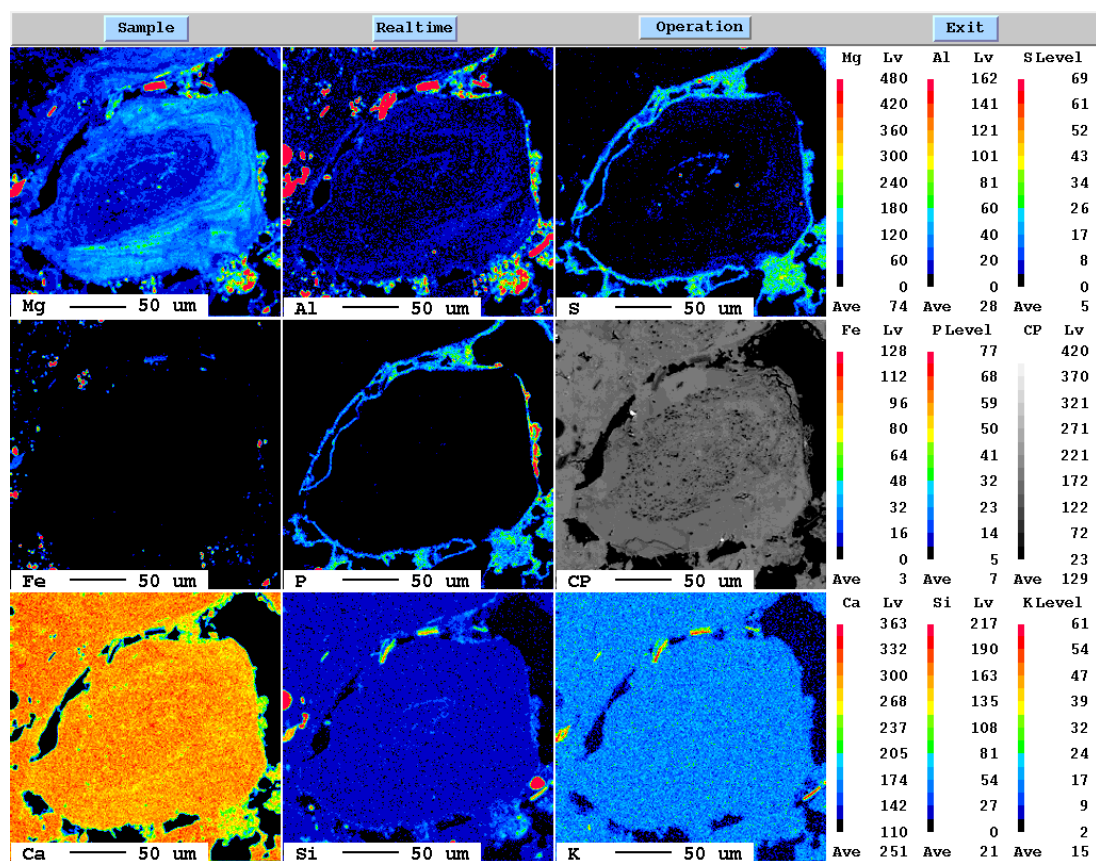

Fig. S4. Complete elemental maps A and B of Figure 8 (continued on next page)



C

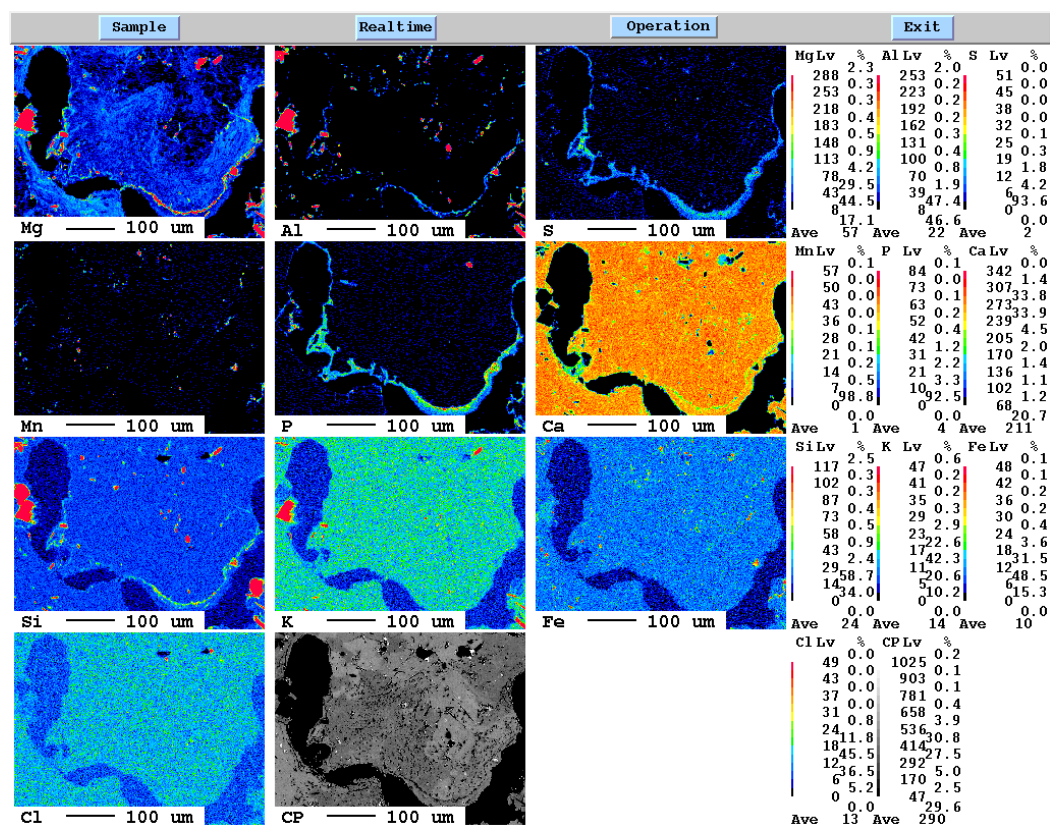

D

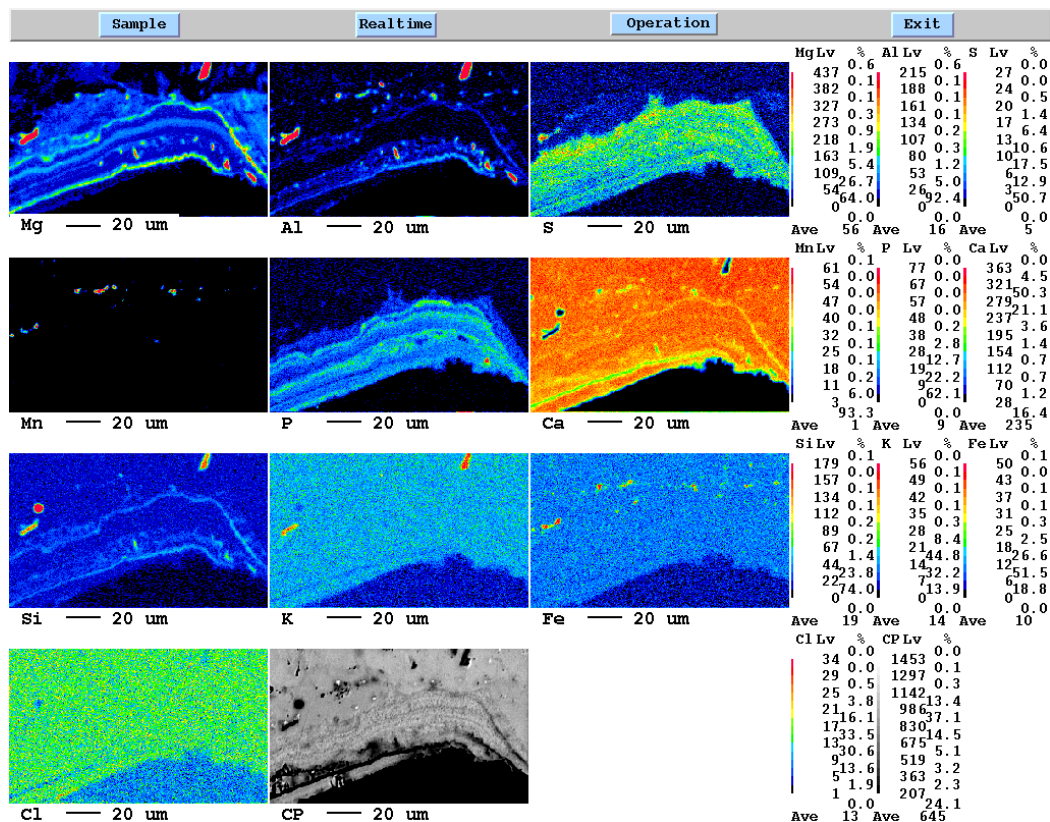

Fig. S4. (contd.) Complete elemental maps C and D of Figure 8
